# Supplementary material
Source: PubMed Central journal article supplement (PMC8923058)
Supplement: NIHMS1775234-supplement-Sup_Info.pdf [file NIHMS1775234-supplement-Sup_Info.pdf]

**Supplementary Table 1. Cost of SDSI+AmpSeq**

| Processing Step                   | Reagent                                  | Vendor                   | Item Number | Cost (dollars) | Number of Reactions | Cost per Reaction |
|-----------------------------------|------------------------------------------|--------------------------|-------------|----------------|---------------------|-------------------|
| Biosample Extraction              | MagMAX™ mirVana™ Total RNA Isolation Kit | Thermo Fisher Scientific | A27828      | 495            | 96                  | 5.16              |
|                                   | SSIV RT master mix                       | Thermo Fisher Scientific | 18090050    | 383            | 50                  | 7.66              |
| cDNA Synthesis                    | Random hexamers (50ng/ul)                | Thermo Fisher Scientific | N808127     | 91             | 100                 | 0.91              |
|                                   | dNTPs (10nM)                             | Thermo Fisher Scientific | 18427-013   | 99             | 100                 | 0.99              |
|                                   | 5x RT buffer                             | Thermo Fisher Scientific | 18090050    | x              | x                   | x                 |
|                                   | DTT (100mM)                              | Thermo Fisher Scientific | 18090050    | x              | x                   | x                 |
|                                   | Superase rnaase inhibitor                | Thermo Fisher Scientific | 10777-019   | 188            | 125                 | 1.50              |
| ARTIC PCR                         | Q5 Hot Start High-Fidelity 2X Master Mix | New England BioLabs      | M0494L      | 845            | 500                 | 1.69              |
|                                   | Artic Primers Pool#1 and Pool#2          | IDT                      |             | 30             | 500                 | 0.06              |
| Spike-ins                         | Spike in Primers (Forward/Reverse)       | IDT                      |             | 500            | 1000000             | 0.00              |
|                                   | Spike-in targets n=96                    | IDT                      |             | 5821           | 1000000             | 0.01              |
| Post Artic Pooling Quantification | Qubit™ dsDNA HS Assay Kit                | Thermo Fisher Scientific | Q32854      | 308            | 500                 | 0.62              |
| Library Construction              | Nextera DNA flex Library Prep (n=96)     | Illumina                 | 20018705    | 4153           | 190                 | 21.86             |
|                                   | Nextera index UD Set A (n=96)            | Illumina                 | 20027213    | 672            | 384                 | 1.75              |

|                        |                                      |         |           |       |     |       |
|------------------------|--------------------------------------|---------|-----------|-------|-----|-------|
| Library Quantification | High Sensitivity D1000 ScreenTape    | Agilent | 5067-5584 | 362   | 112 | 3.23  |
|                        | High Sensitivity D1000 Sample Buffer | Agilent | 5067-5603 | 59.14 | 112 | 0.53  |
| <b>TOTAL:</b>          |                                      |         |           |       |     | 45.96 |

**Supplementary Table 2. Final library quantification for enzyme optimization experiment**

| PCR Enzyme           | Quant (nM) |
|----------------------|------------|
| Q5 2X MM             | 85.3       |
| Q5 2X MM + 0.01% SDS | 0.258      |
| Q5 Ultra             | 34.5       |
| KAPA                 | 56.0       |
| KOD                  | 8.1        |

**Supplementary Table 4. Library size DNA Flex**

| Sample       | CT Dilution | Standard DNA Flex Library Size (bp) | .5X DNA Flex Library Size (bp) | Standard DNA Flex Library Concentration (nM) | .5X DNA Flex Library Concentration (nM) |
|--------------|-------------|-------------------------------------|--------------------------------|----------------------------------------------|-----------------------------------------|
| MA_MGH_00109 | 15.39       | 340                                 | 332                            | 92                                           | 54.3                                    |
| MA_MGH_00110 | 26.39       | 293                                 | 271                            | 13.4                                         | 6.84                                    |
| MA_MGH_00113 | 31.93       | 211                                 | 207                            | 3.05                                         | 1.84                                    |
